# Supplementary material for: Sub-Inhibitory Doses of Individual Constituents of Essential Oils Can Select for Staphylococcus aureus Resistant Mutants
Source: MDPI journal article supplement (doi:10.3390/molecules24010170), 2019-01-04
Supplement: s1 [file s1]

## **SUPPLEMENTAL MATERIAL**

### **Disk diffusion assay**

The agar disc diffusion method was used as preliminary assay for testing the antibacterial effect of the ICs against *S. aureus* USA300 and its derivative strains. A total of 0.5 mL from a  $10^7$  CFU/mL bacterial suspension was spread on the surface of TSAYE plates. Sterile filter paper disks (Whatman Grade 1, 6 mm diameter) were individually impregnated with 1, 2.5, and 30  $\mu$ L of carvacrol, citral, and (+)-limonene oxide, respectively, dissolved in 3% absolute ethanol (Sigma-Aldrich), and then placed on the previously inoculated agar plates. These volumes were previously determined to produce an inhibition halo measurable (data not shown). Plates were kept at 4 °C for 2 h to allow for the diffusion of ICs, and then incubated at 37 °C for 18–24 h. The diameters of the resulting zones of inhibition were measured with a Vernier digital micrometre (accuracy: 0.01 mm) including the diameter of the paper disk. Disks impregnated with 3% ethanol caused no inhibition halos.

**Table S1.** Zones of growth inhibition (mm) showing antibacterial activity for carvacrol (1  $\mu$ L), citral (2.5  $\mu$ L), and (+)-limonene oxide (30  $\mu$ L) against *Staphylococcus aureus* USA300 wild type and its derivative strains isolated: CAR, CIT, and OXLIM. Each value represents the mean diameter of the inhibition halo  $\pm$  standard deviation of the six colonies isolated by each IC. Increases in MIC with regard to WT are shaded.

|                    | WT               | CAR                            | CIT               | OXLIM             |
|--------------------|------------------|--------------------------------|-------------------|-------------------|
| Carvacrol          | 20.49 $\pm$ 0.31 | 14.79 $\pm$ 0.61*              | 17.12 $\pm$ 0.60* | 16.21 $\pm$ 0.49* |
| Citral             | 25.73 $\pm$ 0.37 | 26.01 $\pm$ 0.49 <sup>ns</sup> | 19.14 $\pm$ 0.21* | 19.77 $\pm$ 0.53* |
| (+)-Limonene oxide | 16.04 $\pm$ 0.54 | 16.12 $\pm$ 0.38 <sup>ns</sup> | 14.34 $\pm$ 0.67* | 11.18 $\pm$ 0.29* |

<sup>ns</sup> not significantly different from wild type ( $p > 0.05$ ).

\* significantly different from wild type ( $p \leq 0.05$ ).

**Table S2.** Primers used for verification.

| Verification                                     | Sequence F (5'→ 3')      | Sequence R (5'→ 3')  |
|--------------------------------------------------|--------------------------|----------------------|
| <b>Deleted 43 kb region in CAR</b>               | CTGACAATAGTGCCAAAGCCG    | TGGGGTGTACATTCCACACA |
|                                                  | GGGACCCATTAGGGACTCCA     | GGCCGAGTACAGGTGTTTGA |
| <b>Flanking regions of 43 kb deletion in CAR</b> | CTGACAATAGTGCCAAAGCCG    | GGCCGAGTACAGGTGTTTGA |
| <i>aroC</i> SNP in CIT                           | TCGCATTGCTTGTGCGATAC     | TTGCAGTCGGTGCCTTATGT |
| <i>rpoB</i> SNP in OXLIM                         | TGGTGCAGAAGTAAAAGATGGAGA | TCAAGAACGATACCGCCAGC |

**Table S3.** Large deletion of *Staphylococcus aureus* CAR derivative strain.

| Locus tag        | Gene         | Product                             | Locus tag        | Gene                    | Product                              |
|------------------|--------------|-------------------------------------|------------------|-------------------------|--------------------------------------|
| SAUSA300_RS10505 | <i>hly-1</i> | phosphodiesterase                   | SAUSA300_RS10680 |                         | hypothetical protein                 |
| SAUSA300_RS10510 |              | hypothetical protein                | SAUSA300_RS10685 |                         | DUF1381 domain-containing protein    |
| SAUSA300_RS10515 |              | hypothetical protein                | SAUSA300_RS10690 |                         | hypothetical protein                 |
| SAUSA300_RS10520 |              | hypothetical protein                | SAUSA300_RS10695 | <i>dut</i>              | dUTP pyrophosphatase                 |
| SAUSA300_RS10525 | <i>scn</i>   | staphylococcal complement inhibitor | SAUSA300_RS10700 |                         | hypothetical protein                 |
| SAUSA300_RS10530 | <i>chp</i>   | chemotaxis inhibitory protein       | SAUSA300_RS10705 |                         | DUF1024 domain-containing protein    |
| SAUSA300_RS10535 |              | peptidoglycan hydrolase             | SAUSA300_RS10710 |                         | hypothetical protein                 |
| SAUSA300_RS10540 | <i>sak</i>   | staphylokinase                      | SAUSA300_RS10715 |                         | hypothetical protein                 |
| SAUSA300_RS10545 | <i>ami</i>   | amidase                             | SAUSA300_RS10720 |                         | hypothetical protein                 |
| SAUSA300_RS10550 |              | phage holin                         | SAUSA300_RS10725 | <i>rusA</i>             | Holliday junction DNA helicase       |
| SAUSA300_RS10555 |              | hypothetical protein                | SAUSA300_RS10730 |                         | hypothetical protein                 |
| SAUSA300_RS10565 |              | DUF2951 domain-containing protein   | SAUSA300_RS10735 | <i>dnaD<sub>2</sub></i> | replication protein DnaD             |
| SAUSA300_RS10570 |              | hypothetical protein                | SAUSA300_RS10740 | <i>ssb2</i>             | single-stranded DNA-binding protein  |
| SAUSA300_RS10575 |              | hypothetical protein                | SAUSA300_RS10745 |                         | MBL fold metallo-hydrolase           |
| SAUSA300_RS10580 |              | hypothetical protein                | SAUSA300_RS10750 | <i>recT</i>             | recombinase                          |
| SAUSA300_RS10585 |              | phage tail protein                  | SAUSA300_RS10755 |                         | ATPase                               |
| SAUSA300_RS10590 |              | phage tail tape measure protein     | SAUSA300_RS10760 |                         | DUF1108 domain-containing protein    |
| SAUSA300_RS10600 |              | hypothetical protein                | SAUSA300_RS10765 |                         | hypothetical protein                 |
| SAUSA300_RS10605 |              | phage tail protein                  | SAUSA300_RS10770 |                         | DUF1270 domain-containing protein    |
| SAUSA300_RS10610 |              | hypothetical protein                | SAUSA300_RS10775 |                         | DUF771 domain-containing protein     |
| SAUSA300_RS10615 |              | hypothetical protein                | SAUSA300_RS10780 |                         | hypothetical protein                 |
| SAUSA300_RS10620 |              | phage head-tail adapter protein     | SAUSA300_RS10785 |                         | oxidoreductase                       |
| SAUSA300_RS10625 |              | phage head-tail adapter protein     | SAUSA300_RS10790 |                         | hypothetical protein                 |
| SAUSA300_RS10630 |              | hypothetical protein                | SAUSA300_RS10795 |                         | DUF2829 domain-containing protein    |
| SAUSA300_RS10635 |              | phage major capsid protein          | SAUSA300_RS10800 |                         | XRE family transcriptional regulator |
| SAUSA300_RS10640 |              | Clp protease ClpP                   | SAUSA300_RS10805 |                         | transcriptional regulator            |
| SAUSA300_RS10645 |              | phage portal protein                | SAUSA300_RS10810 |                         | XRE family transcriptional regulator |
| SAUSA300_RS10650 |              | terminase large subunit             | SAUSA300_RS10815 |                         | ATP-dependent helicase               |
| SAUSA300_RS10655 |              | hypothetical protein                | SAUSA300_RS10820 |                         | hypothetical protein                 |
| SAUSA300_RS10660 |              | HNH endonuclease                    | SAUSA300_RS10825 |                         | hypothetical protein                 |
| SAUSA300_RS10665 |              | hypothetical protein                | SAUSA300_RS10830 |                         | toxin MazF                           |
| SAUSA300_RS10670 |              | hypothetical protein                | SAUSA300_RS10835 | <i>int3</i>             | site-specific integrase              |
| SAUSA300_RS10675 |              | transcriptional activator RinB      |                  |                         |                                      |
